# Supplementary material for: Ecofriendly urea-free pretreatment to enhance the inkjet printing performance of reactive dye inks on cotton fabrics
Source: Royal Society of Chemistry journal article supplement (doi:10.1039/d2gc02635j), 2022-01-01
Supplement: d2gc02635j1.pdf [file d2gc02635j1.pdf]

## Supporting Information

### **Eco-friendly urea-free pretreatment to enhance the inkjet printing performance of reactive dye ink on cotton fabric**

**Lei Wang<sup>a,b,c\*</sup>, Guangyuan Xie<sup>a</sup>, Hanchang Hu<sup>d</sup>, Qiuyu Zhu<sup>a</sup>, Jing Zhou<sup>a</sup>,  
Zhicheng Yu<sup>a</sup>**

<sup>a</sup> *Engineering Research Center for Eco-Dyeing and Finishing of Textiles, Zhejiang Sci-Tech University, Hangzhou 310018, Zhejiang, China*

<sup>b</sup> *China National Textile and Apparel Council Key Laboratory of Natural Dyes, Soochow University, Suzhou 215123, China*

<sup>c</sup> *Key Laboratory of Clean Dyeing and Finishing Technology of Zhejiang Province, Shaoxing 312000, Zhejiang, China*

<sup>d</sup> *College of Chemistry, Chemical Engineering and Biotechnology, Donghua University, Shanghai 201620, China*

\*Corresponding Author: Lei Wang

Email: [wanglei90@zstu.edu.cn](mailto:wanglei90@zstu.edu.cn)

**Table 1S. Diffusion coefficients of reactive dye through cotton fabrics with different moisture contents.**

|                                    | 5% moisture contetn   | 15% moisture contetn  | 30% moisture contetn  | 65% moisture contetn  |
|------------------------------------|-----------------------|-----------------------|-----------------------|-----------------------|
| $D$ ( $\text{cm}^2\text{s}^{-1}$ ) | $1.65 \times 10^{-6}$ | $6.62 \times 10^{-6}$ | $1.66 \times 10^{-5}$ | $2.42 \times 10^{-5}$ |

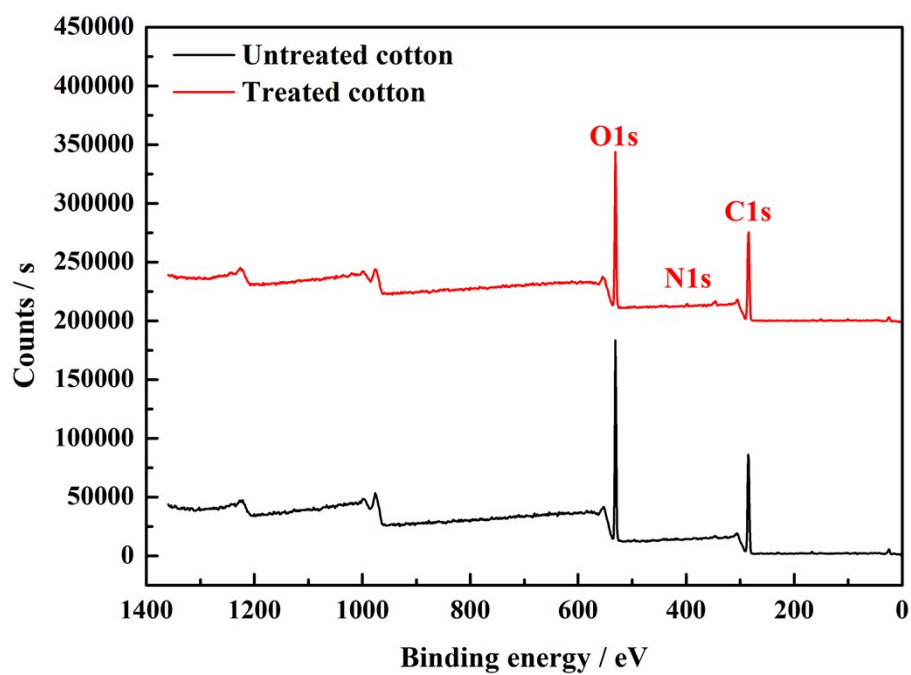

**Figure 1S. Survey scan of XPS analysis of cotton fabric (a) untreated and (b) treated by urea-free dye fixation process.**

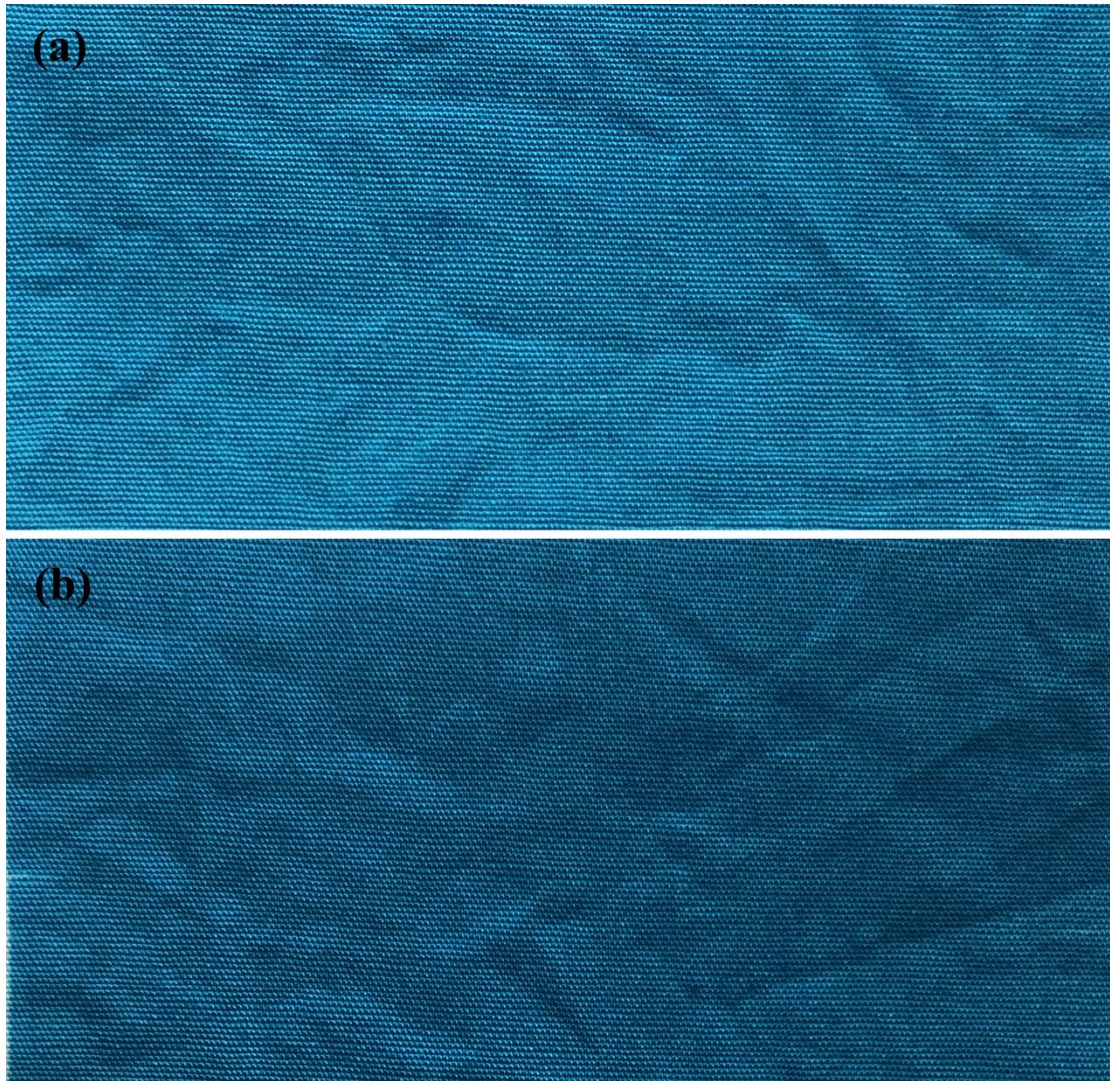

**Figure 2S. The picture of the cotton fabric printed (a) conventional process, (b) urea-free dye fixation process.**
